# Supplementary material for: Practical Synthesis of Cap‐4 RNA
Source: PubMed Central journal article supplement (PMC7004131; doi:10.1002/cbic.201900590), 2019-11-08

# CHEMBIOCHEM

## Supporting Information

### **Practical Synthesis of Cap-4 RNA**

Josef Leiter,<sup>[a]</sup> Dennis Reichert,<sup>[b]</sup> Andrea Rentmeister,<sup>[b]</sup> and Ronald Micura\*<sup>[a]</sup>

cbic\_201900590\_sm\_miscellaneous\_information.pdf

# Supporting Information

to

## Practical Synthesis of Cap-4 RNA

Josef Leiter,<sup>[a]</sup> Dennis Reichert,<sup>[b]</sup> Andrea Rentmeister<sup>[b]</sup> and Ronald Micura\*<sup>[a]</sup>

<sup>[a]</sup> Institute of Organic Chemistry, Center for Molecular Biosciences, University of Innsbruck

<sup>[a]</sup> Department of Chemistry, Institute of Biochemistry, University of Münster, Germany

### Contents

|                                      |    |
|--------------------------------------|----|
| 1. General                           | 2  |
| 2. Protein expression                | 2  |
| 3. Protein purification              | 2  |
| 4. Activity assay                    | 3  |
| 5. Supporting Figure S1              | 4  |
| 6. Supporting Figure S2              | 5  |
| 7. NMR spectra of compound <b>2</b>  | 6  |
| 8. NMR spectra of compound <b>3</b>  | 7  |
| 9. NMR spectra of compound <b>5</b>  | 8  |
| 10. NMR spectra of compound <b>6</b> | 9  |
| 11. NMR spectra of compound <b>7</b> | 10 |
| 12. NMR spectra of compound <b>8</b> | 11 |
| 13. NMR spectra of compound <b>9</b> | 12 |

## General

Reagents were purchased in the highest available quality from commercial suppliers (Sigma-Aldrich, abcr, Carbosynth) and used without further purification. Moisture sensitive reactions were carried out under argon atmosphere.  $^1\text{H}$  and  $^{13}\text{C}$  spectra were recorded on a Bruker 400 spectrometer. Chemical shifts ( $\delta$ ) are reported relative to tetramethylsilane (TMS) referenced to the residual proton signal of the deuterated solvent (DMSO- $d_6$ : 2.50 ppm for  $^1\text{H}$  spectra and 39.52 ppm for  $^{13}\text{C}$  spectra;  $\text{CDCl}_3$ : 7.26 ppm for  $^1\text{H}$  spectra and 77.16 ppm for  $^{13}\text{C}$  spectra). The following abbreviations were used to denote multiplicities: s = singlet, d = doublet, t = triplet, m = multiplet, b = broad. Signal assignments are based on  $^1\text{H}$ - $^1\text{H}$ -COSY,  $^1\text{H}$ - $^{13}\text{C}$ -HSQC and  $^1\text{H}$ - $^{13}\text{C}$ -HMBC experiments. MS experiments were performed on a Thermo Scientific Q Exactive Orbitrap with an electrospray ion source. Samples were analyzed in the positive ion mode. Reaction control was performed via analytical thin-layer chromatography (TLC, Macherey-Nagel) with fluorescent indicator. Column chromatography was carried out on silica gel 60 (70-230 mesh); for RP column chromatography, LiChrorep RP-18 (40-63 $\mu\text{m}$ ) material was used.

## Protein Expression

For protein production, *E. coli* BL21(DE3) cells were freshly transformed with the respective vectors pET16b-Ecm1, pET29-LuxS and pProEx-MTAN and grown shaking overnight in LB-medium at 37°C. Next, these cultures were used to inoculate the main culture in LB-medium (ratio 1:100) containing the respective antibiotic as selection marker. Cells were grown shaking at 37°C to an optical density OD<sub>600</sub> = 0.6 and protein expression was induced by addition of 0.2 mM IPTG with subsequent incubation over night at 18°C. Cells were harvested by centrifugation (15 min, 4000 xg, 4°C). The resulting cell pellet was stored at –20°C before use.

## Protein Purification

The thawed cell pellet was resuspended in 10 mL lysis buffer (50 mM Tris-HCl, 200 mM NaCl, pH 7.5) for Ecm1 and (30 mM sodium phosphate, 500 mM NaCl pH 7.2) for MTAN/LuxS containing 300  $\mu\text{M}$  of protease inhibitor PMSF. The cells were lysed by sonication and the supernatant was cleared by centrifugation (30 min, 22000 xg, 4°C). Next the desired protein was purified via affinity chromatography using a 1 mL HisTrap (GE Healthcare) column using lysis buffer containing 500 mM imidazole for elution. In order to obtain RNase-free proteins size exclusion chromatography was subsequently performed using Superdex 200 Increase 10/300 GL column (GE Healthcare) in gel filtration buffer (50 mM Tris-HCl pH 7.5, 200 mM NaCl, 2 mM DTT, 1 mM EDTA, 10% glycerol) for Ecm1 and (30 mM sodium phosphate pH 7.2, 500 mM NaCl, 50 mM Hepes, 10% glycerol) for

MTAN/LuxS. The eluted fractions were concentrated and checked for RNase contamination before the protein purity and concentration was determined by comparison with BSA standard on SDS-PAGE gel.

### **Activity assay**

Enzymatic methylation of 5' cap analog GpppA (0.5 mM) (Jena Bioscience) was performed using SAM (1 mM) with 10  $\mu$ L concentrated protein fraction in the presence of 5  $\mu$ M MTAN and LuxS in phosphate buffer (20 mM phosphate buffer, 150 mM NaCl, pH 7.4) at 37°C. Samples were taken at certain time points and the reaction stopped by adding 1/10 volume 1 M HClO<sub>4</sub>. The conversion of GpppA to m<sup>7</sup>GpppA was analyzed by reversed-phase HPLC. The analysis was conducted on a NUCLEODUR® C18 Pyramid (125×4 mm) column (Macherey-Nagel). Elution was performed at a flow rate of 1 mL/min in a linear gradient of buffer A (100 mM phosphate buffer, pH = 6.5) and buffer B (50 % buffer A, 50 % ACN).

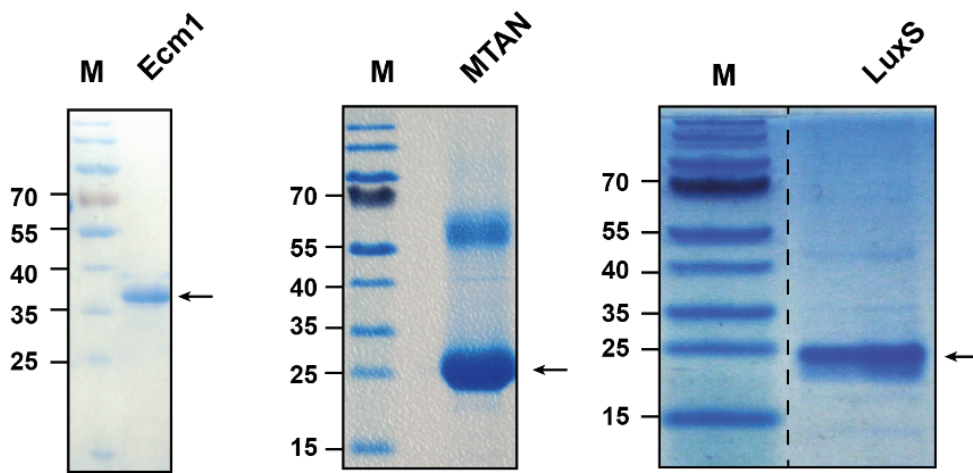

**Supporting Figure S1.** Isolated protein fraction after purification. Proteins of interest Ecm1 (37 kDa) MTAN (29 kDa) and LuxS (23 kDa) are marked by arrows.

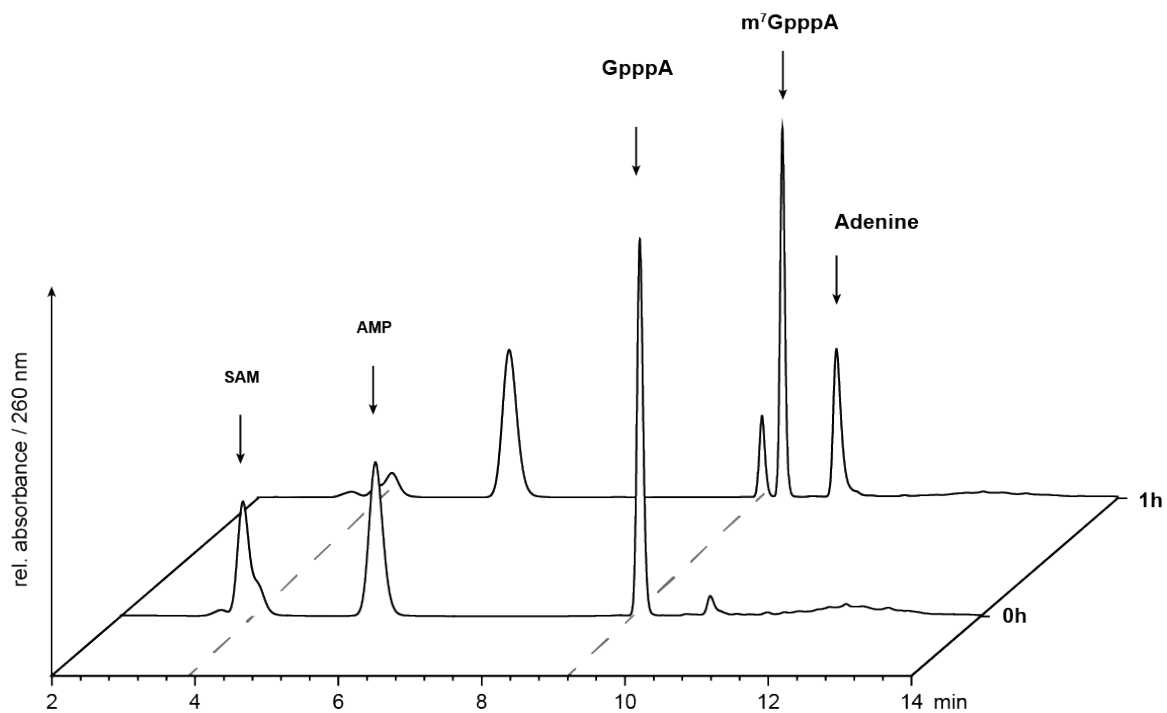

**Supporting Figure S2.** Activity-test using the concentrated protein fraction. After 1 h reaction time at 37°C, 80% conversion of 0.5 mM GpppA (corresponding to 0.9 U/ $\mu$ L enzyme) was detected in presence of 1 mM SAM, 5  $\mu$ M MTAN/LuxS at pH 7.4. 1 mM adenosine monophosphate (AMP) was used as internal standard.

<sup>1</sup>H-NMR (300 MHz, DMSO-d<sub>6</sub>) of compound **2**

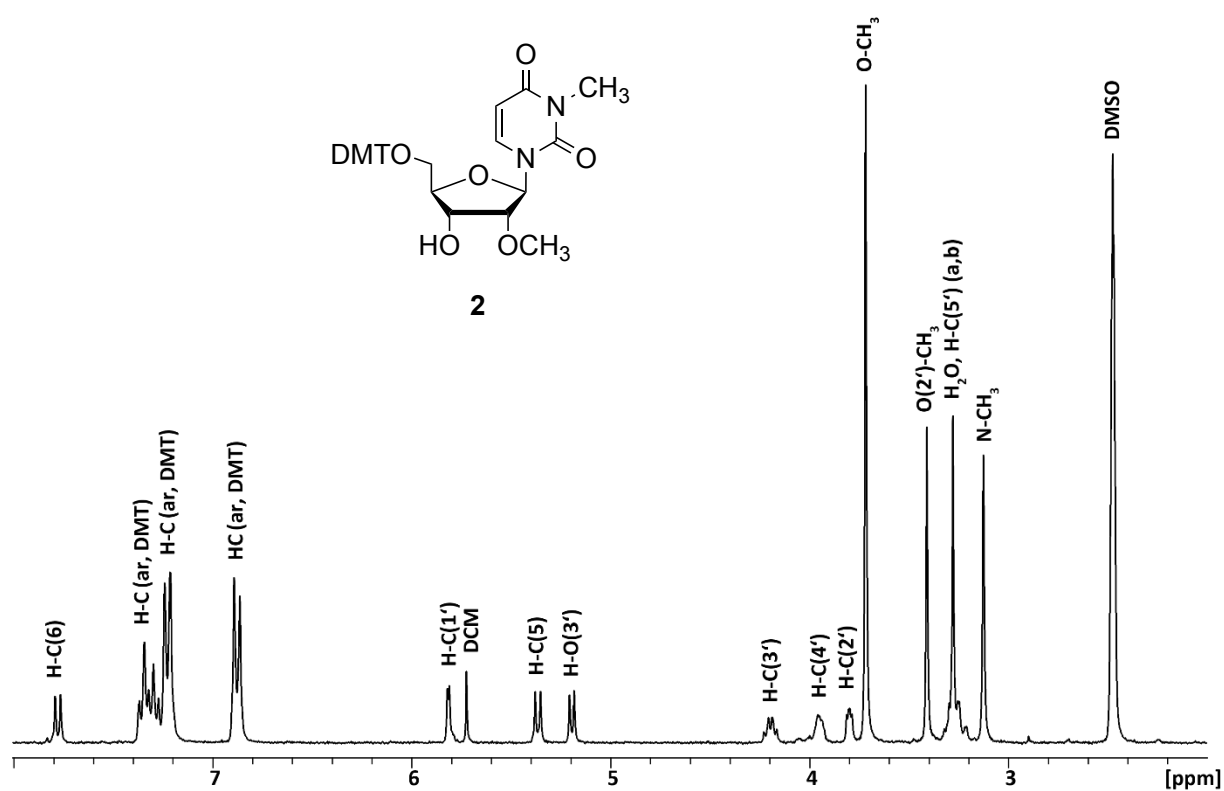

<sup>13</sup>C-NMR (75 MHz, DMSO-d<sub>6</sub>) of compound **2**

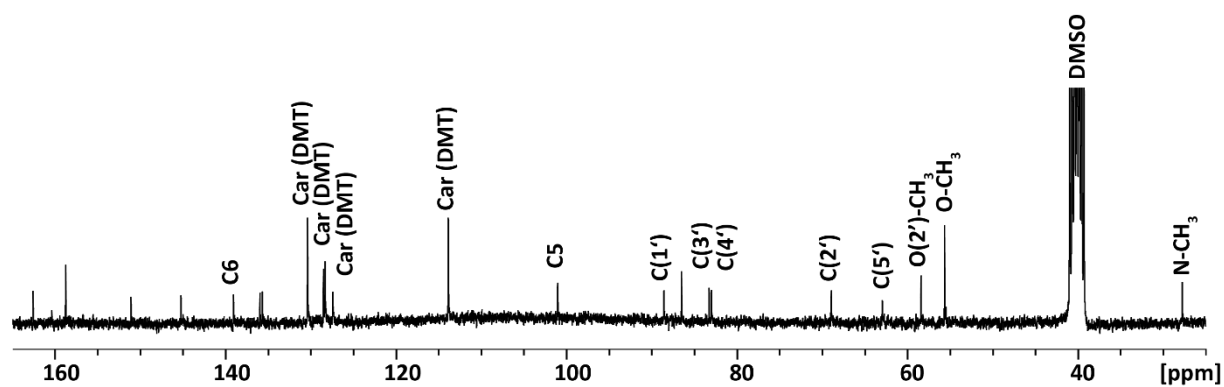

<sup>1</sup>H-NMR (700 MHz, CDCl<sub>3</sub>) of compound **3**

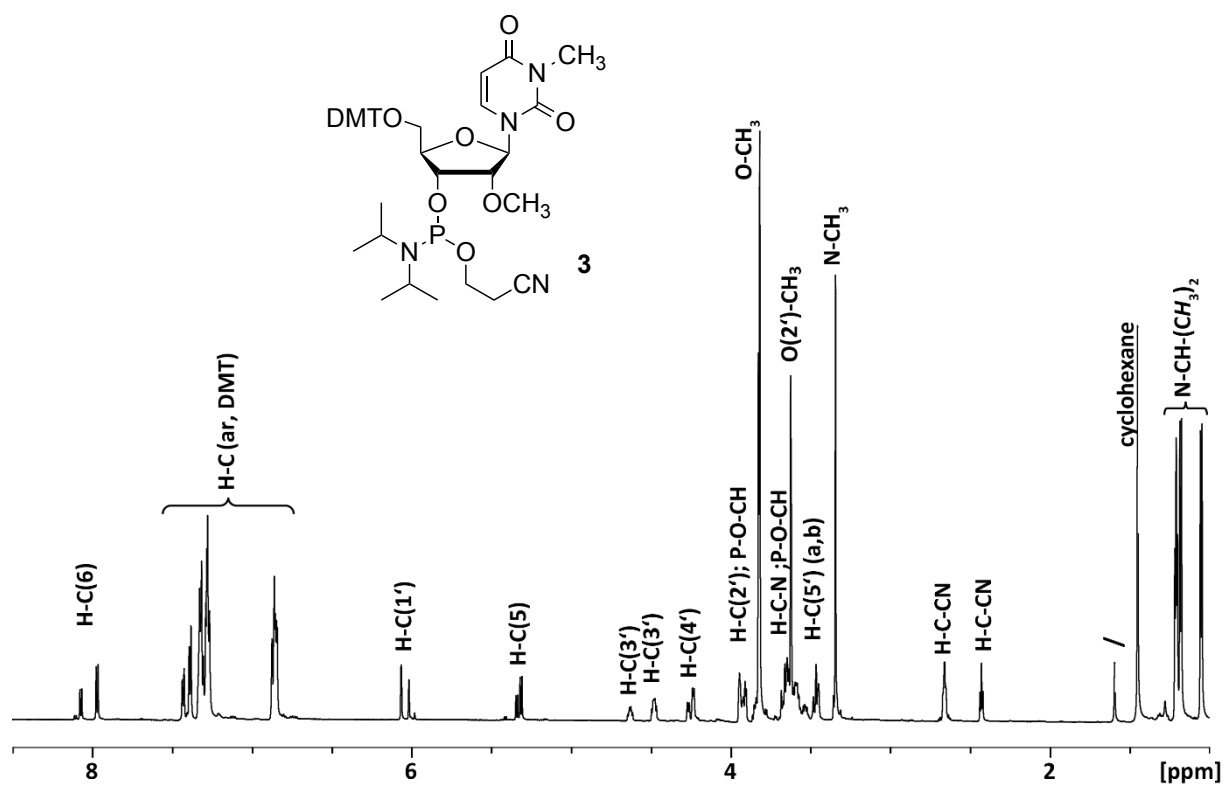

<sup>31</sup>P-NMR (162 MHz, CDCl<sub>3</sub>) of compound **3**

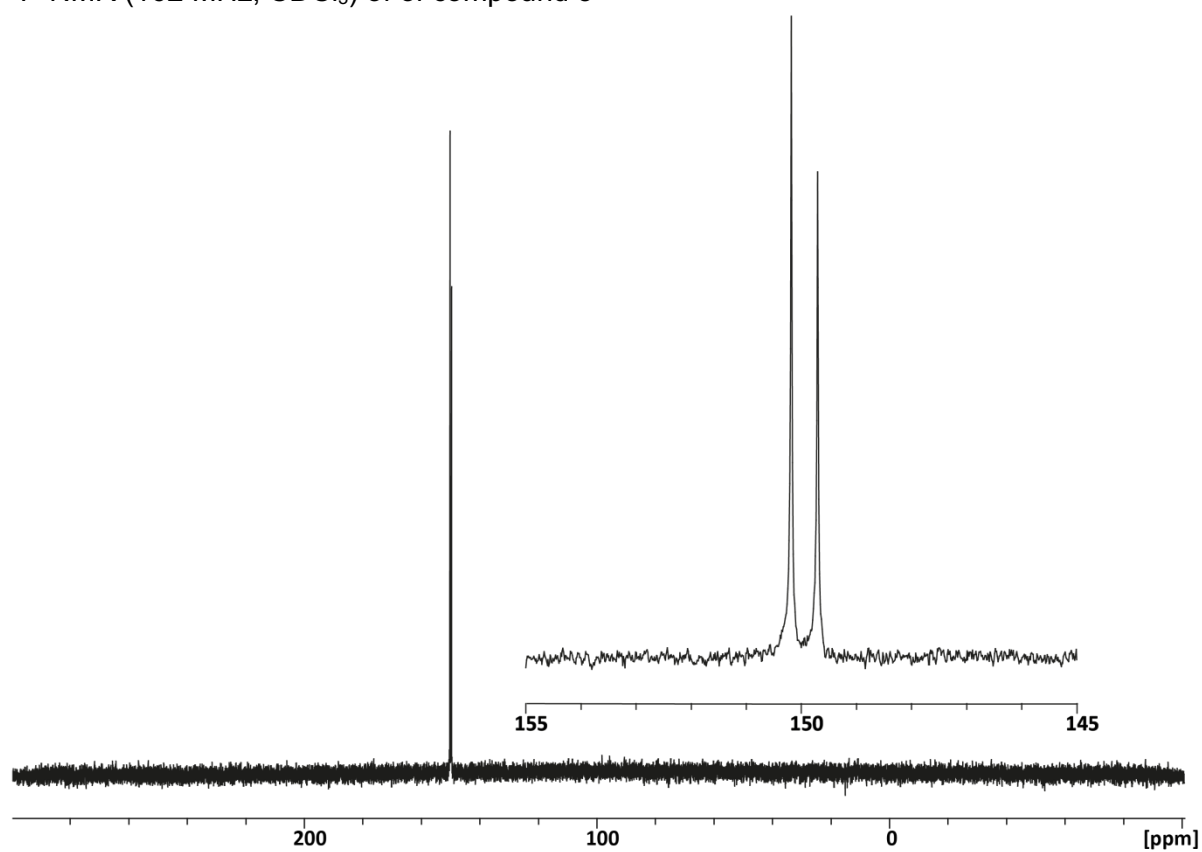



<sup>1</sup>H-NMR (300 MHz, DMSO-d<sub>6</sub>) of compound **5**

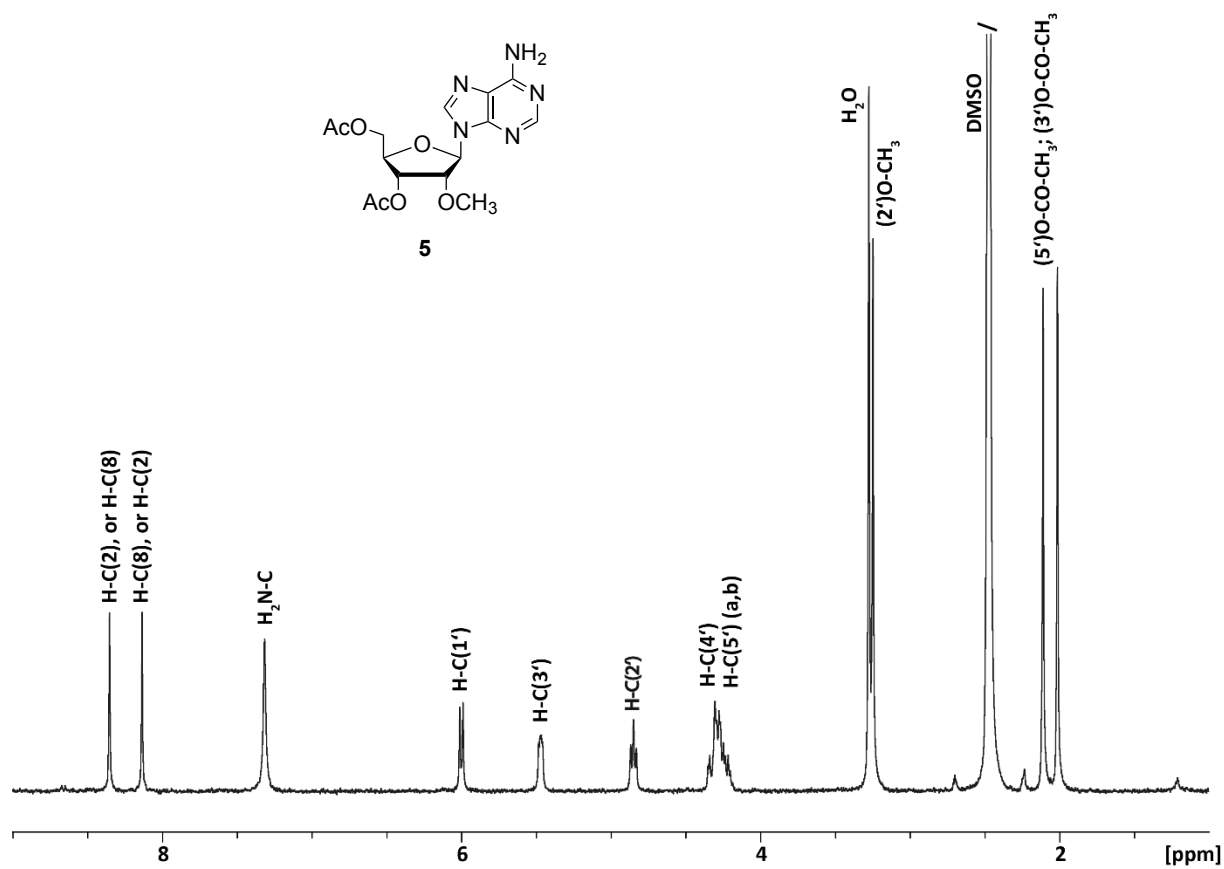

<sup>13</sup>C-NMR (75 MHz, DMSO-d<sub>6</sub>) of compound **5**

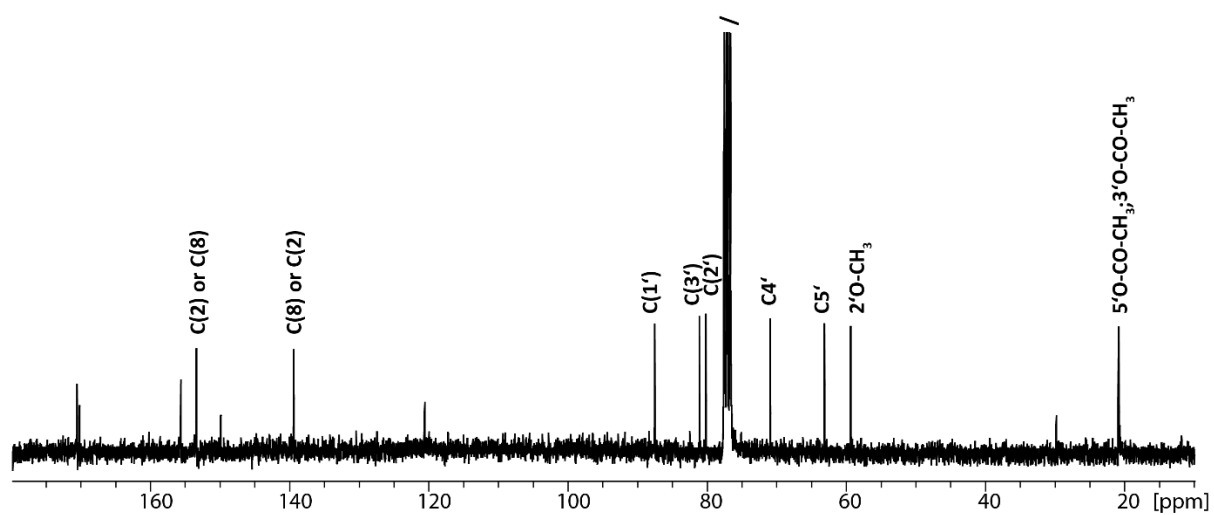

<sup>1</sup>H-NMR (300 MHz, DMSO-d<sub>6</sub>) of compound **6**

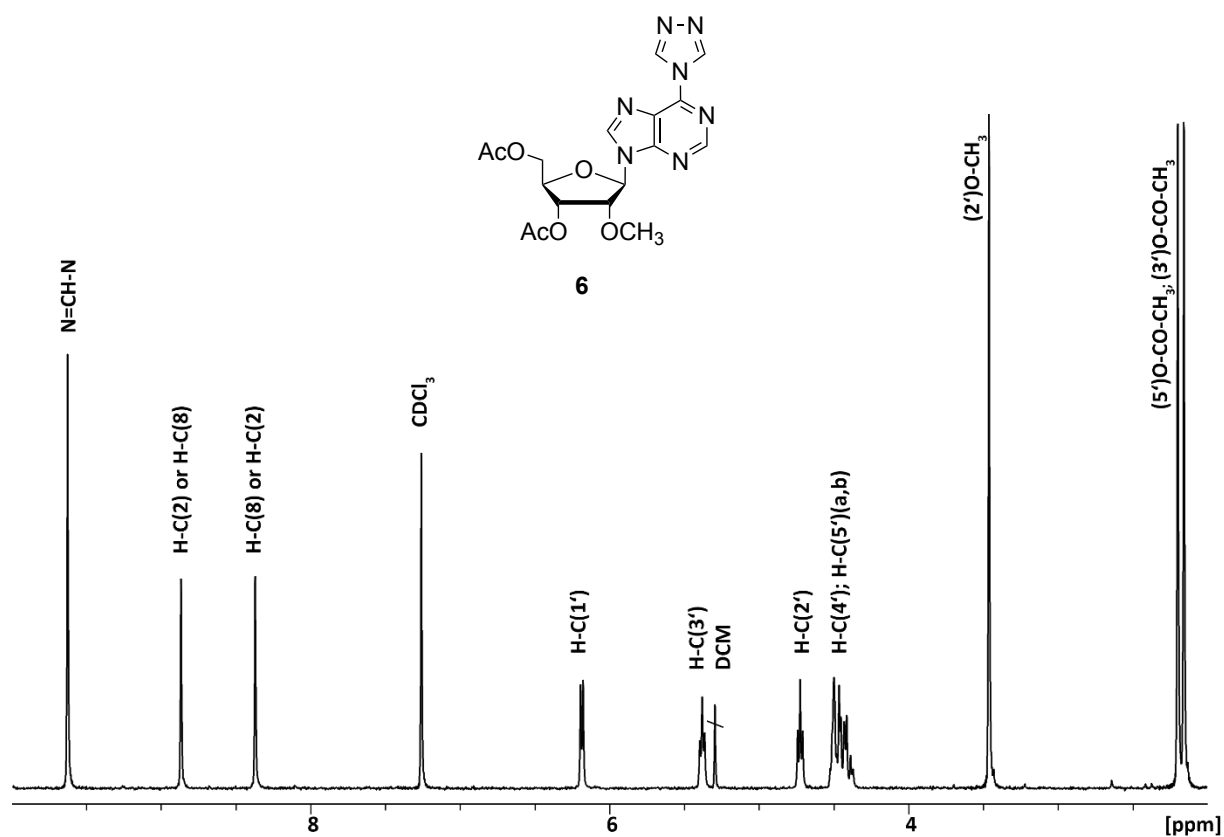

<sup>13</sup>C-NMR (75 MHz, DMSO-d<sub>6</sub>) of compound **6**

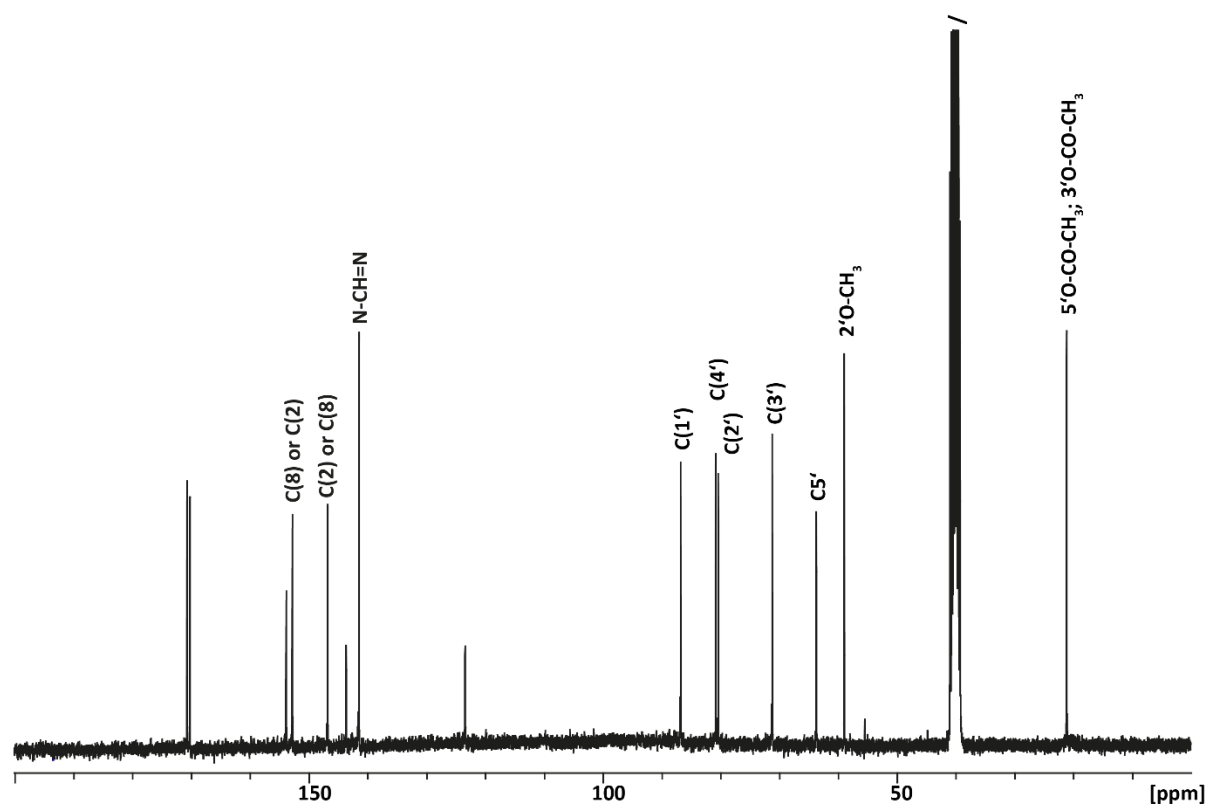

<sup>1</sup>H-NMR (300 MHz, DMSO-d<sub>6</sub>) of compound 7

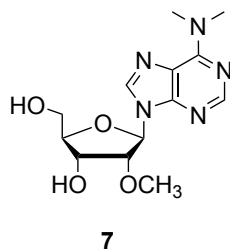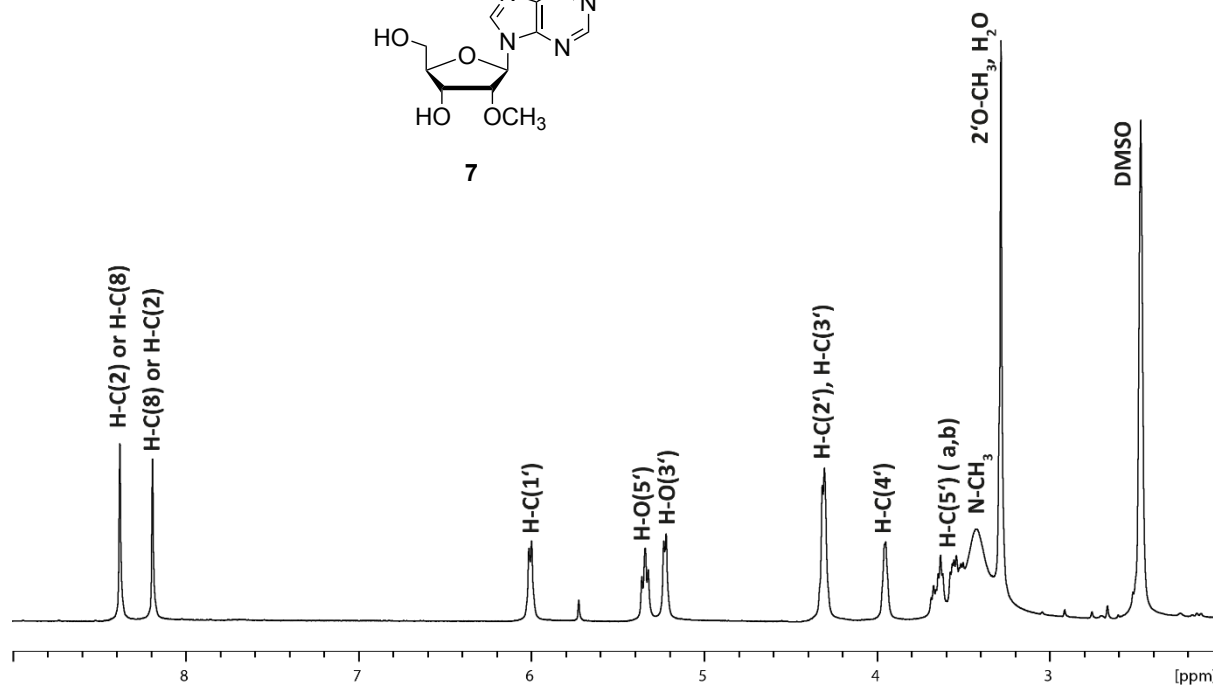

<sup>13</sup>C-NMR (75 MHz, DMSO-d<sub>6</sub>) of compound 7

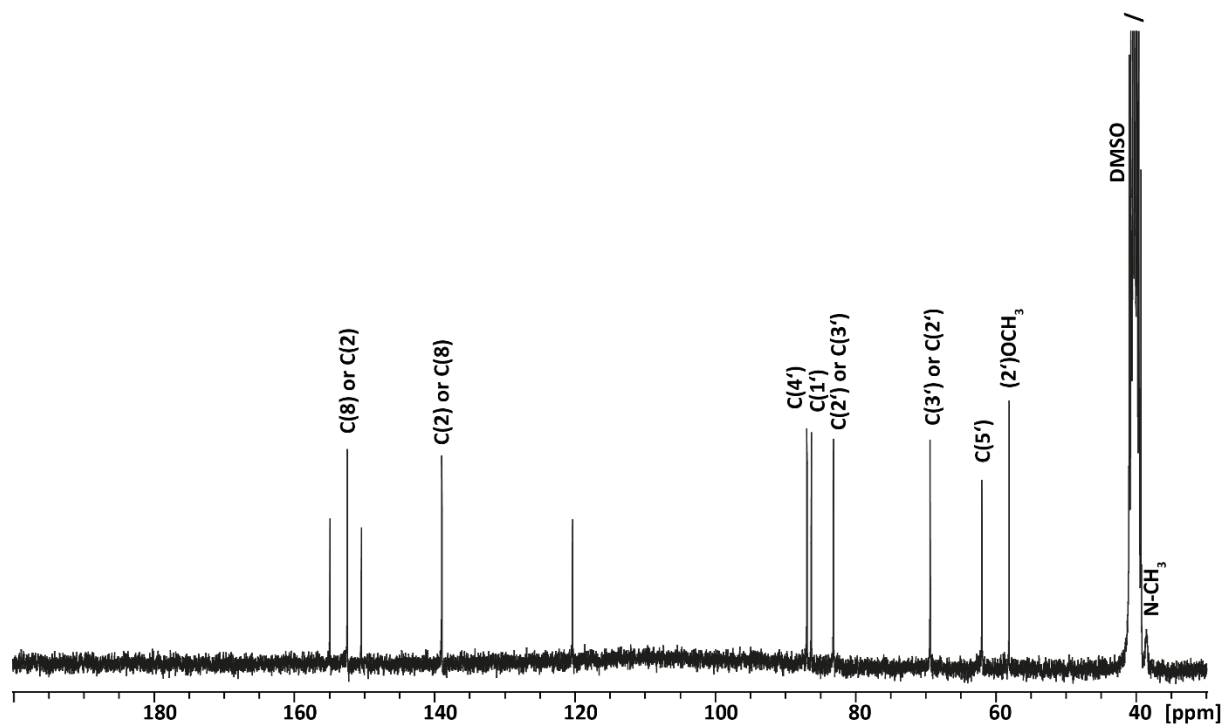

<sup>1</sup>H-NMR (300 MHz, DMSO-d<sub>6</sub>) of compound **8**

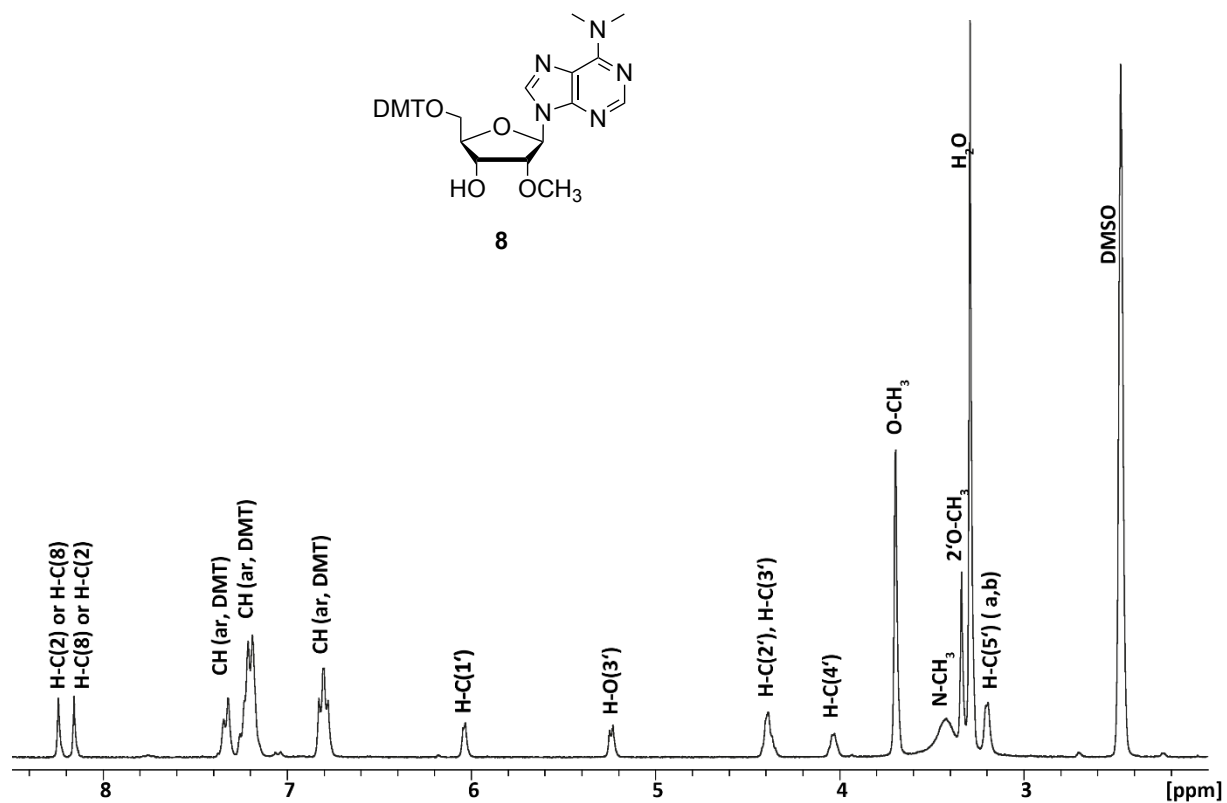

<sup>13</sup>C-NMR (75 MHz, DMSO-d<sub>6</sub>) of compound **8**

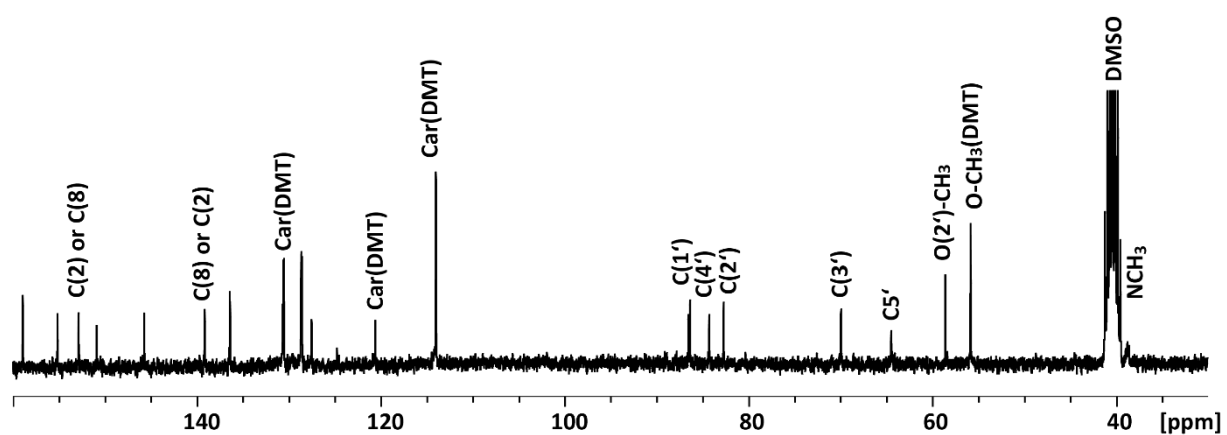

<sup>1</sup>H-NMR (700 MHz, CDCl<sub>3</sub>) of compound **9**

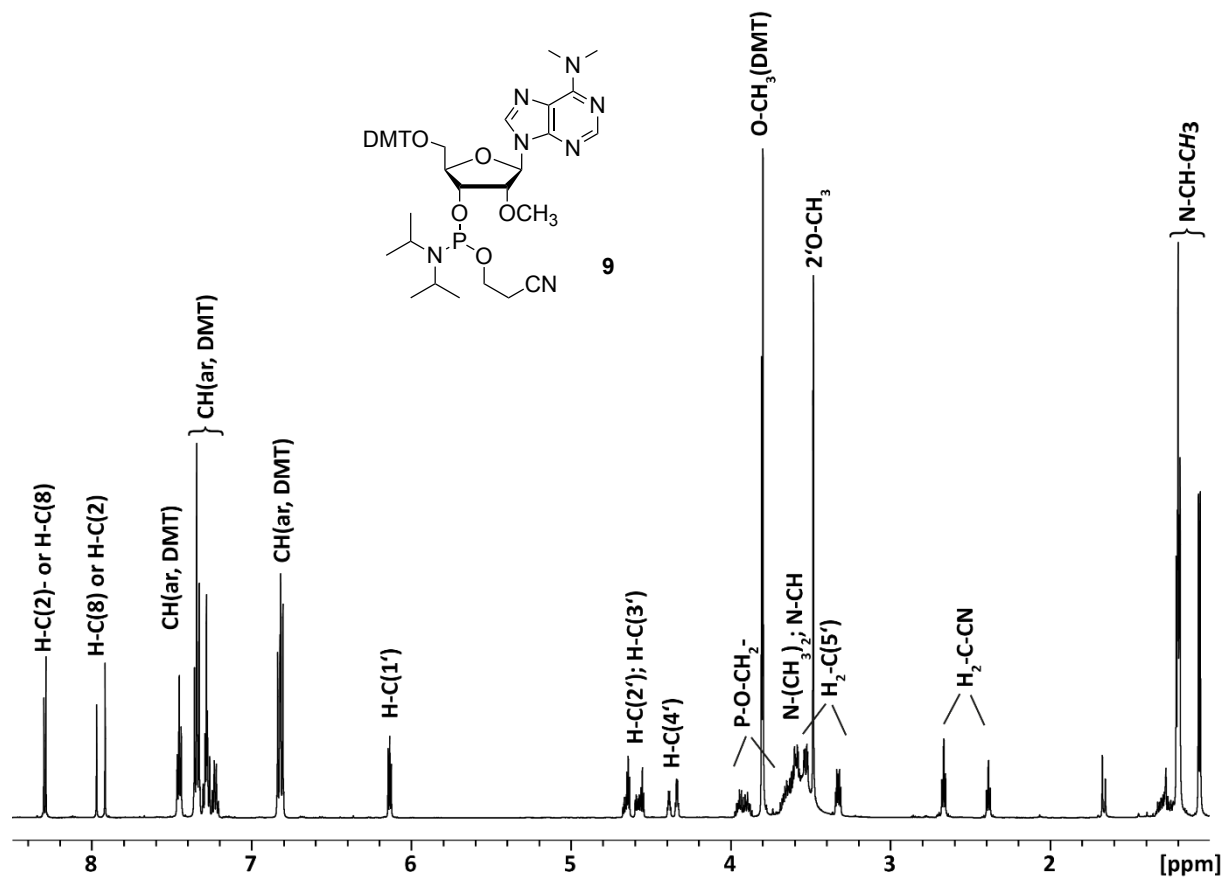

<sup>31</sup>P-NMR (162 MHz, CDCl<sub>3</sub>) of compound **9**

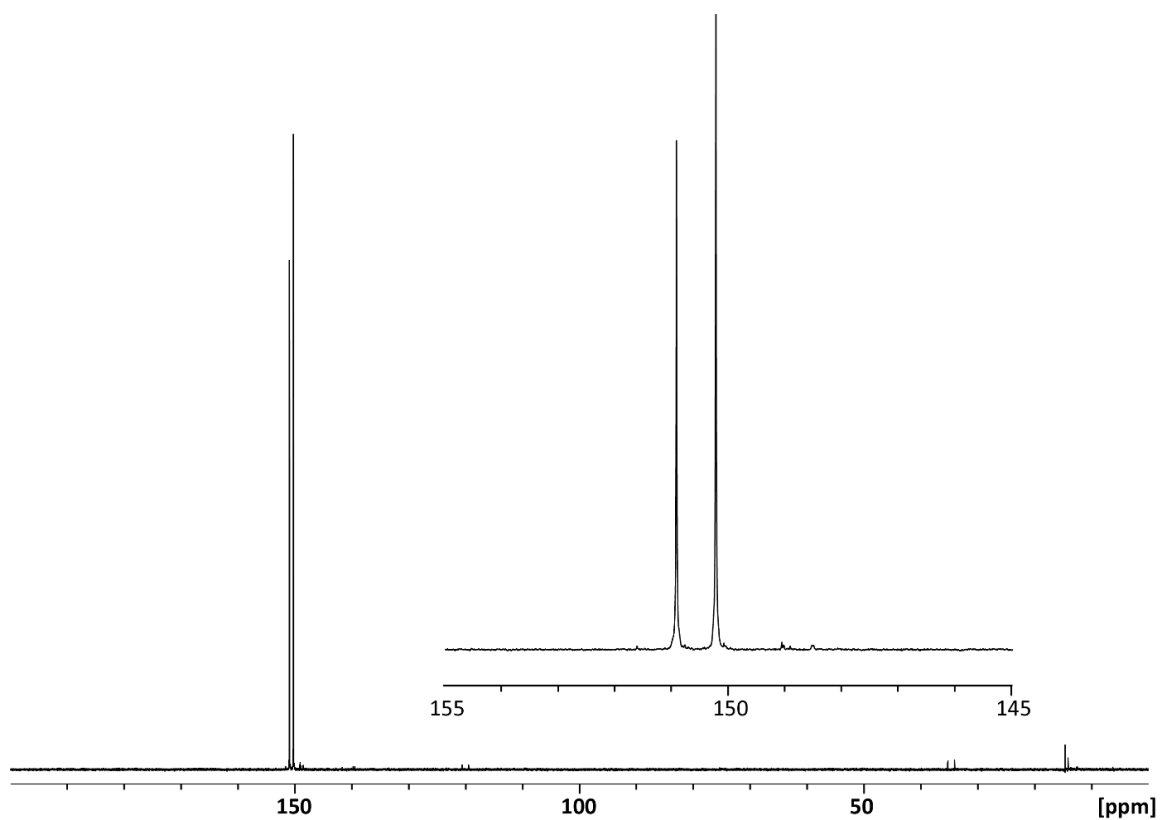

Supplement: CBIC-21-265-s001.pdf [file CBIC-21-265-s001.pdf]
